# Supplementary material for: Wartime food availability in the Gaza Strip, October 2023 to August 2024: a retrospective analysis
Source: bioRxiv or medRxiv preprint supplement (doi:10.1101/2024.10.21.24315753), 2024-10-22
Supplement: Supplementary file [file media-1.pdf]

# Wartime food availability in the Gaza Strip, October 2023 to August 2024: a retrospective analysis

Francesco Checchi, Mija-Tesse Ververs, Zeina Jamaluddine

## ANNEX

## Caloric equivalent of trucks

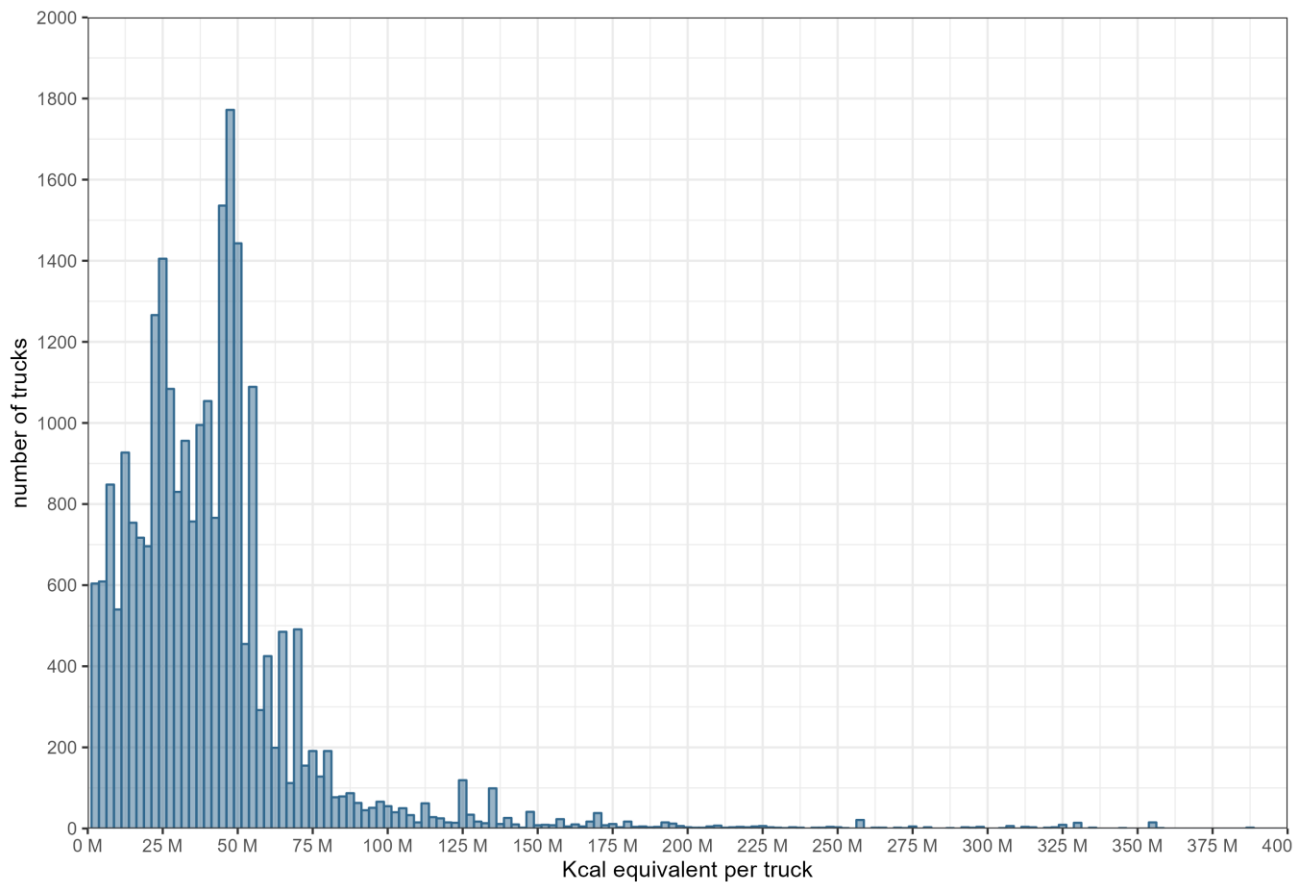

Figure S1. Distribution of estimated Kcal per truck, according to UNRWA data.

## Food items trucked into Gaza

Table S1. Number of times different food items were trucked into Gaza according to the UNRWA database, before and after the 5 May 2024 Rafah operation.

| item              | before Rafah operation | post-Rafah operation |
|-------------------|------------------------|----------------------|
| apples            | 28                     | 0                    |
| baby food         | 5                      | 0                    |
| baby milk         | 12                     | 1                    |
| beans             | 64                     | 3                    |
| biscuits          | 424                    | 290                  |
| bread             | 17                     | 55                   |
| bulgur            | 2                      | 0                    |
| cake              | 75                     | 31                   |
| candies           | 9                      | 32                   |
| canned beans      | 60                     | 11                   |
| canned chickpeas  | 1                      | 0                    |
| canned corn       | 2                      | 4                    |
| canned food       | 288                    | 60                   |
| canned hummus     | 2                      | 0                    |
| canned vegetables | 2                      | 0                    |
| carrot            | 1                      | 4                    |
| cerelac           | 3                      | 0                    |
| cheese            | 232                    | 52                   |
| chicken           | 3                      | 0                    |
| chicken broth     | 1                      | 0                    |
| chickpeas         | 24                     | 38                   |
| chips             | 37                     | 28                   |
| chocolate         | 7                      | 12                   |
| clarified butter  | 16                     | 40                   |
| coconut           | 1                      | 0                    |
| coffee            | 38                     | 163                  |
| cooked food       | 1                      | 0                    |
| cooking oil       | 150                    | 63                   |
| corn              | 3                      | 10                   |
| cream             | 1                      | 0                    |
| croissants        | 115                    | 0                    |
| dairy products    | 2                      | 0                    |
| dates             | 141                    | 3                    |
| dried koshary     | 1                      | 0                    |
| eggplant          | 1                      | 0                    |
| eggs              | 53                     | 232                  |
| fava beans        | 3                      | 0                    |
| fish              | 4                      | 0                    |
| flour             | 5575                   | 1958                 |
| food              | 9                      | 3                    |
| food baskets      | 1                      | 0                    |
| food cartons      | 1                      | 0                    |
| food items        | 3326                   | 1105                 |
| food parcels      | 4484                   | 962                  |
| food supplies     | 1                      | 0                    |
| frozen chicken    | 184                    | 474                  |
| frozen meat       | 86                     | 174                  |
| frozen okra       | 5                      | 0                    |
| frozen vegetables | 7                      | 0                    |
| fruits            | 8                      | 1257                 |
| garlic            | 30                     | 3                    |
| grapes            | 2                      | 0                    |
| green beans       | 1                      | 1                    |
| halawa            | 50                     | 2                    |
| honey             | 22                     | 1                    |
| hummus            | 16                     | 3                    |
| instant noodles   | 36                     | 0                    |
| jam               | 8                      | 13                   |
| juice             | 85                     | 410                  |
| jute leaves       | 2                      | 0                    |
| kiwi              | 1                      | 0                    |
| legumes           | 32                     | 69                   |

| item           | before Rafah operation | post-Rafah operation |
|----------------|------------------------|----------------------|
| lemons         | 19                     | 27                   |
| lentils        | 180                    | 89                   |
| lentil soup    | 1                      | 0                    |
| luncheon       | 178                    | 0                    |
| meat           | 5                      | 0                    |
| melon          | 5                      | 1                    |
| milk           | 155                    | 105                  |
| noodles        | 68                     | 367                  |
| nuts           | 4                      | 133                  |
| oatmeal        | 1                      | 0                    |
| oil            | 246                    | 366                  |
| onions         | 98                     | 119                  |
| oranges        | 37                     | 2                    |
| pasta          | 176                    | 31                   |
| peanuts        | 1                      | 0                    |
| pears          | 1                      | 0                    |
| peas           | 2                      | 0                    |
| pineapples     | 1                      | 0                    |
| pistachios     | 12                     | 4                    |
| pomegranates   | 3                      | 0                    |
| potatoes       | 139                    | 91                   |
| raisins        | 8                      | 0                    |
| ration packs   | 1                      | 0                    |
| ready meals    | 67                     | 0                    |
| rice           | 436                    | 200                  |
| sage           | 9                      | 0                    |
| salt           | 66                     | 239                  |
| sardine        | 1                      | 0                    |
| sauce          | 35                     | 35                   |
| semolina flour | 25                     | 29                   |
| sesame seeds   | 1                      | 0                    |
| soda           | 23                     | 0                    |
| spices         | 8                      | 36                   |
| starch         | 6                      | 24                   |
| strawberries   | 1                      | 0                    |
| sugar          | 247                    | 444                  |
| sweet potatoes | 1                      | 0                    |
| tahini         | 4                      | 15                   |
| tea            | 13                     | 58                   |
| thyme          | 2                      | 0                    |
| tomato paste   | 16                     | 0                    |
| tomato sauce   | 61                     | 48                   |
| tomatoes       | 5                      | 11                   |
| tortilla       | 2                      | 0                    |
| tuna           | 84                     | 9                    |
| vegetable oil  | 8                      | 0                    |
| vegetables     | 13                     | 716                  |
| watermelon     | 1                      | 24                   |
| yeast          | 33                     | 16                   |
| yogurt         | 4                      | 0                    |

## Baseline adult caloric intake

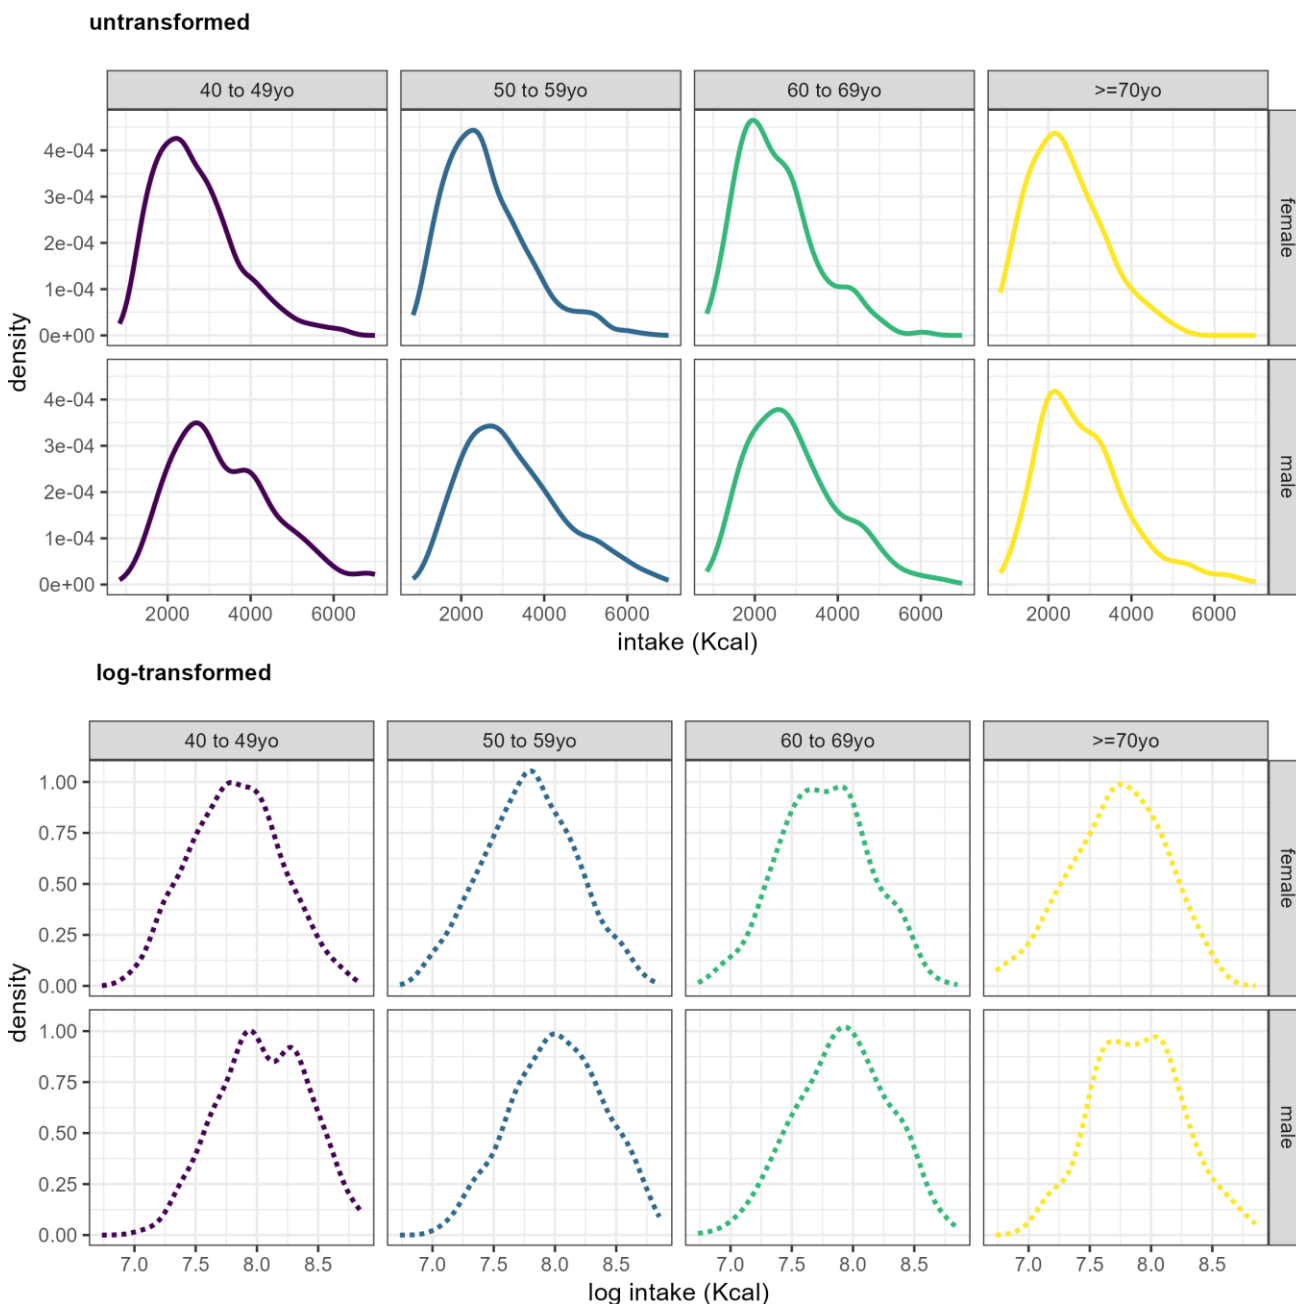

Figure S2. Untransformed and log-transformed distributions of daily caloric intake by age and sex, 2020 [1].

Source:

1. Abu Hamad BA, Jamaluddine Z, Safadi G, Ragi M-E, Ahmad RES, Vamos EP, et al. The hypertension cascade of care in the midst of conflict: the case of the Gaza Strip. *J Hum Hypertens.* 2023;37:957–68.
